# Supplementary material for: Tert-butylamidinate tin(ii) complexes: high activity, single-site initiators for the controlled production of polylactide
Source: Royal Society of Chemistry journal article supplement (doi:10.1039/b706663e), 2007-01-01
Supplement: b706663e.pdf [file b706663e.pdf]

Supplementary Information for:

**Tert-butylamidinate tin(II) complexes: single-site initiators  
for the controlled production of poly(lactic acid)**

Nonsee Nimitsirawat,<sup>a</sup> Vernon C. Gibson,<sup>a\*</sup> Edward L. Marshall,<sup>a\*</sup>  
Andrew J. P. White,<sup>a</sup> Sophie H. Dale<sup>b</sup> and Mark R. J. Elsegood<sup>b</sup>

*a) Department of Chemistry, Imperial College London, South Kensington Campus, London SW7 2AZ, U.K.*

*b) Chemistry Department, Loughborough University, Loughborough, Leicestershire LE11 3TU, U.K.*

## 1. X-ray Crystallography

### Complex 1:

The two independent  $C_2$ -symmetric complexes present in the crystals of **1** have similar geometries, the biggest difference between them being a respective *ca.*  $9^\circ$  twist between their N(1)-bound 2,6-diisopropylphenyl rings.

**Table 1.** Selected bond lengths (Å) and angles ( $^\circ$ ) for **1**.

|                | Mol I    | Mol II   |               | Mol I      | Mol II     |
|----------------|----------|----------|---------------|------------|------------|
| Sn–N(1)        | 2.197(2) | 2.215(3) | Sn–N(2)       | 2.444(2)   | 2.389(2)   |
| N(1)–C(3)      | 1.343(3) | 1.348(4) | N(2)–C(3)     | 1.314(3)   | 1.315(4)   |
| N(1)–Sn–N(2)   | 57.13(8) | 57.92(9) | N(1)–Sn–N(1A) | 101.33(12) | 102.89(13) |
| N(1)–Sn–N(2A)  | 97.98(8) | 96.45(9) | N(2)–Sn–N(2A) | 142.84(11) | 140.74(12) |
| N(1)–C(3)–N(2) | 114.1(2) | 114.1(2) |               |            |            |

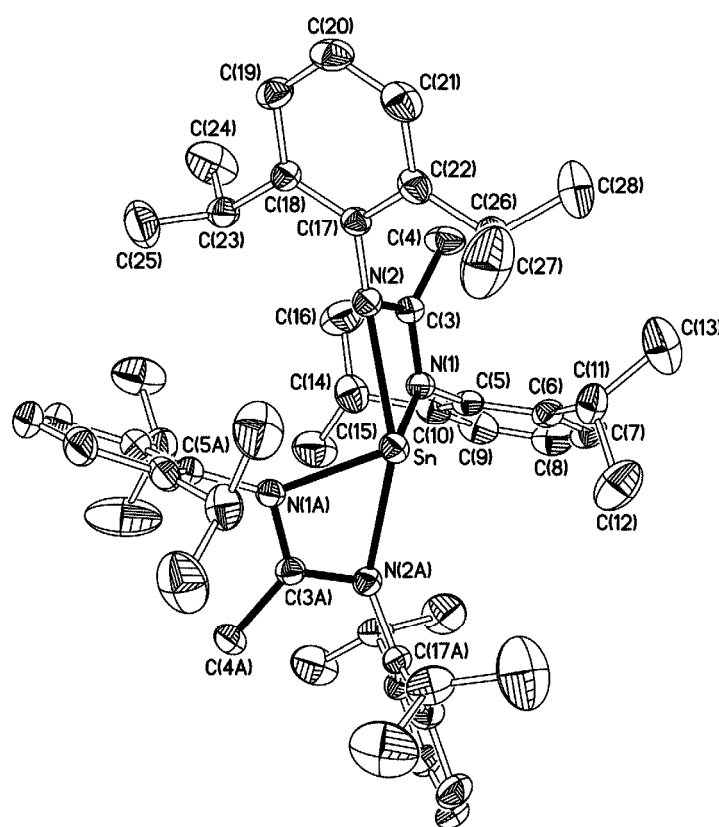

**Figure S1.** The molecular structure of one (**I**) of the two independent  $C_2$ -symmetric molecules present in the crystals of **1** (50% probability ellipsoids).

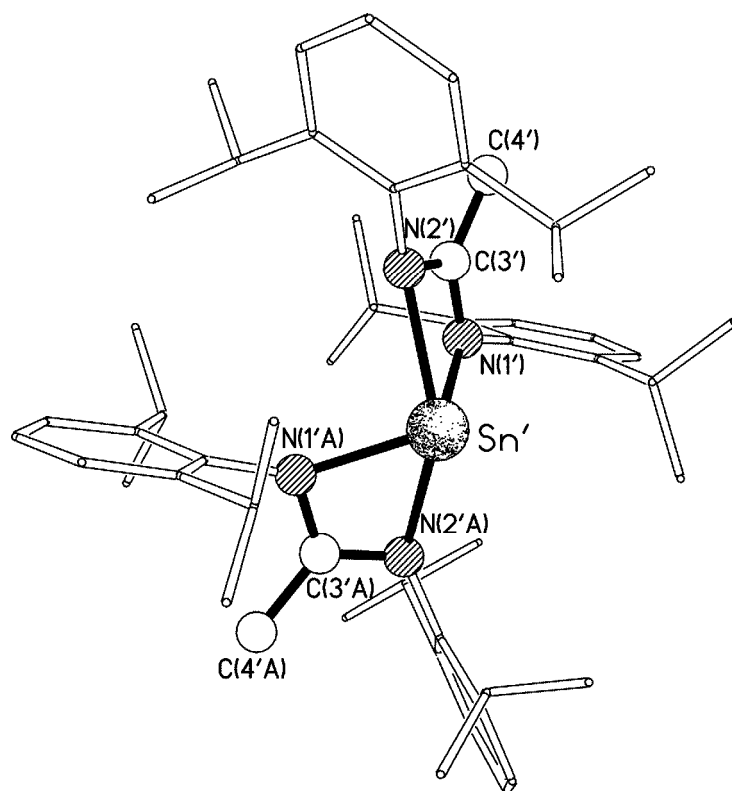

**Figure S2.** The molecular structure of one (II) of the two independent  $C_2$ -symmetric molecules present in the crystals of **1**.

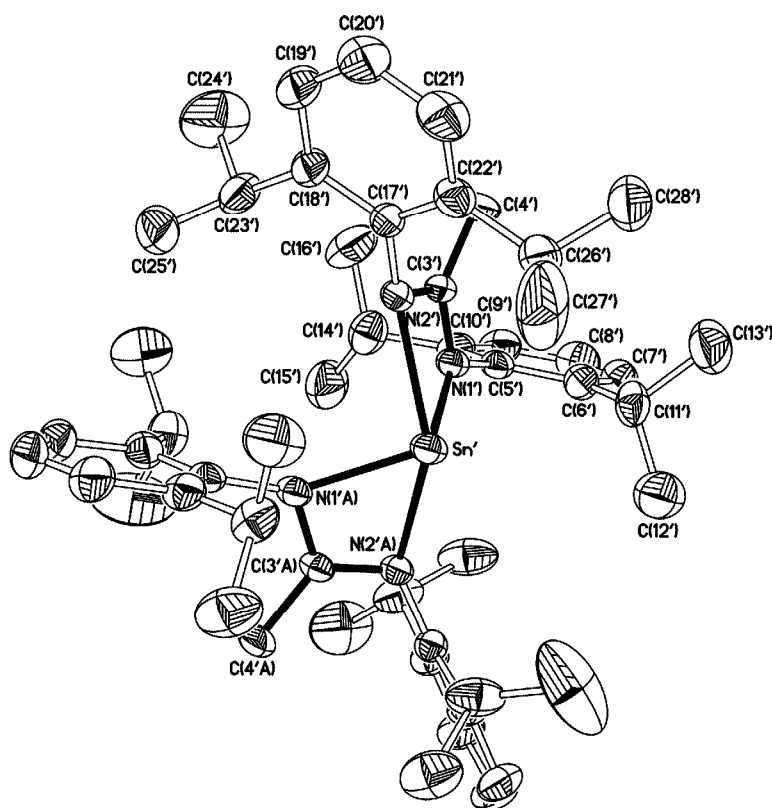

**Figure S3.** The molecular structure of one (II) of the two independent  $C_2$ -symmetric molecules present in the crystals of **1** (50% probability ellipsoids).

## 2. Relationship between $M_n$ and $[LA]_0/[3]$

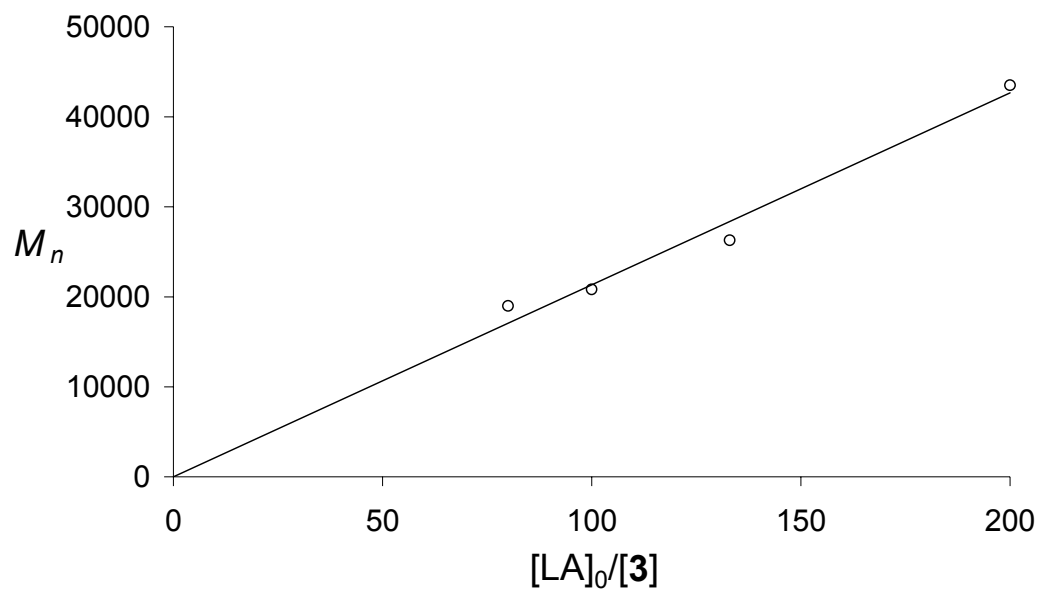

**Figure S4.** A plot of  $M_n$  vs.  $[LA]_0/[3]$  for the polymerisation of *rac*-LA at 60 °C in toluene ( $M_n$  determined by GPC).

### 3. Determination of the rate law order dependence upon the concentration of **3**.

Kinetic studies using **3** were carried out by performing polymerisations at different concentrations of the tin(II) initiator ( $1.4 - 3.5 \times 10^{-2} \text{ mol l}^{-1}$ ) and at constant initial lactide concentration ( $0.28 \text{ mol l}^{-1}$ ; 200 – 80 equivalents). The monomer conversion (toluene,  $60 \text{ }^\circ\text{C}$ ) was then monitored with respect to time. In every case the semilogarithmic plot of LA conversion with time was linear, indicating a first order dependence on the concentration of lactide (Figure S5). Thus, the polymerisation proceeds according to the rate law:

$$-\frac{d[\text{LA}]}{dt} = k_{app}[\text{LA}] \quad (\text{equation S1})$$

where  $k_{app} = k_p[\mathbf{3}]^x$  ( $k_p$  is the rate constant of propagation).

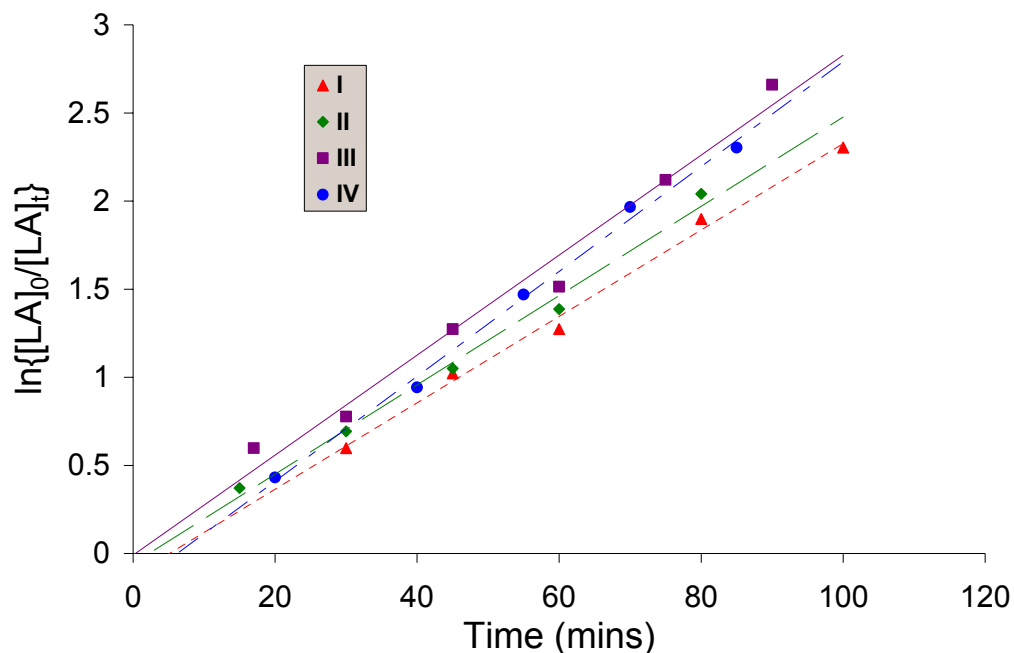

**Figure S5.** Plots of  $\ln\{[\text{LA}]_0/[\text{LA}]_t\}$  vs. time for the polymerisation of *rac*-LA using complex **3** in toluene at  $60 \text{ }^\circ\text{C}$  ( $[\text{LA}]_0 = 0.28 \text{ M}$ ; I:  $[\mathbf{3}] = 0.0035 \text{ M}$ ; II:  $[\mathbf{3}] = 0.0021 \text{ M}$ ; III:  $[\mathbf{3}] = 0.0028 \text{ M}$ ; IV:  $[\mathbf{3}] = 0.0014 \text{ M}$ ).

As the concentration of lactide remains constant throughout this study comparison of the  $k_{app}$  values obtained at each concentration of **3** (chosen to give monomer : initiator stoichiometries of 80, 100, 133 and 200) can be used to derive the order in the tin(II) complex (*i.e.*  $x$ ). Rearrangement of equation S2 into equation S3 shows that the value of  $x$  can be obtained from the slope of the plot of  $\ln k_{app}$  against  $\ln[3]$  (Figure S6):

$$k_{app} = k_p[3]^x \quad (\text{equation S2})$$

$$\therefore \ln k_{app} = \ln k_p + x \ln[3] \quad (\text{equation S3})$$

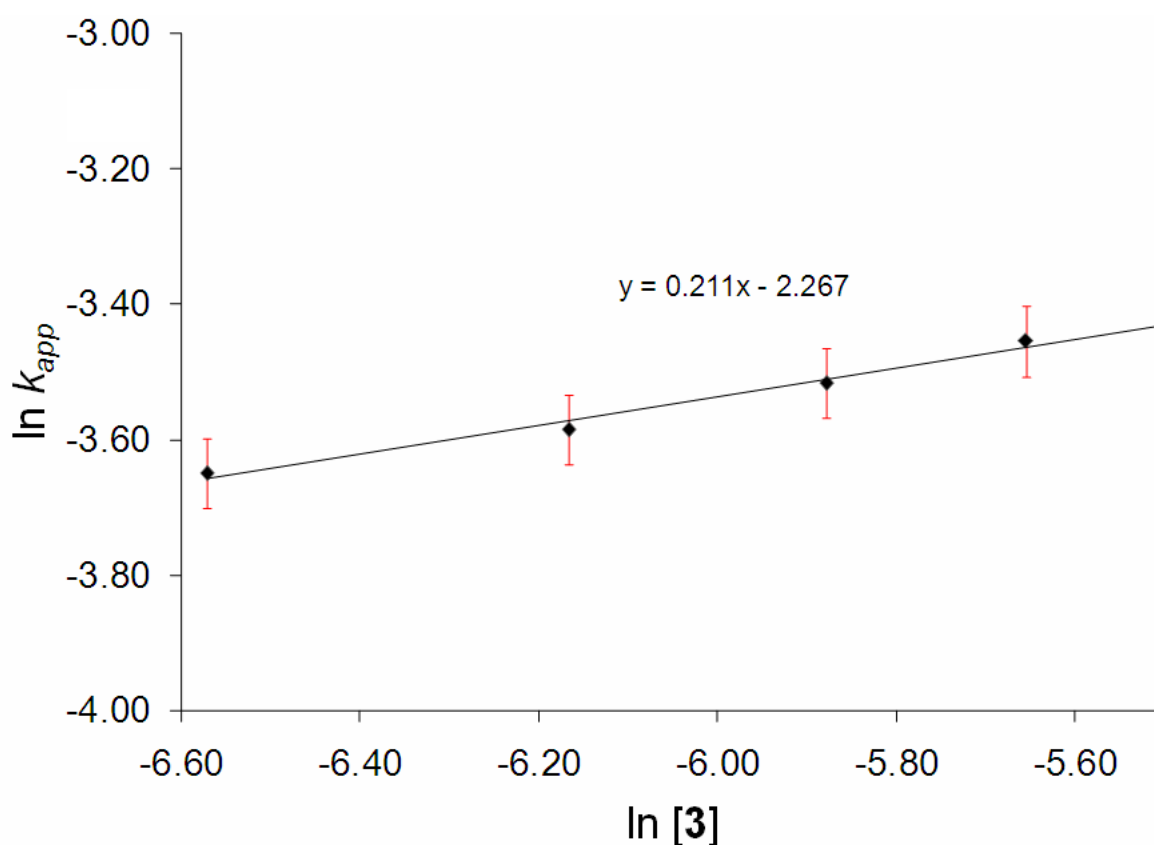

Figure S6. A plot of  $\ln k_{app}$  versus  $\ln [3]$  for the polymerisation of *rac*-LA in toluene at 60 °C.

The slope of the resulting plot (Figure S6) was found to be 0.21. The overall rate law for the polymerisation is therefore:

$$-\frac{d[\text{LA}]}{dt} = k_{\text{app}}[\text{LA}] = k_{\text{p}}[\text{LA}][\mathbf{3}]^{0.21}$$
